# Supplementary material for: Effects of Replacing Alfalfa Hay With Native Grass Hay in Pelleted Total Mixed Ration on Physicochemical Parameters, Fatty Acid Profile, and Rumen Microbiota in Lamb
Source: Frontiers journal article supplement (doi:10.3389/fmicb.2022.861025), 2022-04-29
Supplement: Image_1.pdf [file Image_1.pdf]

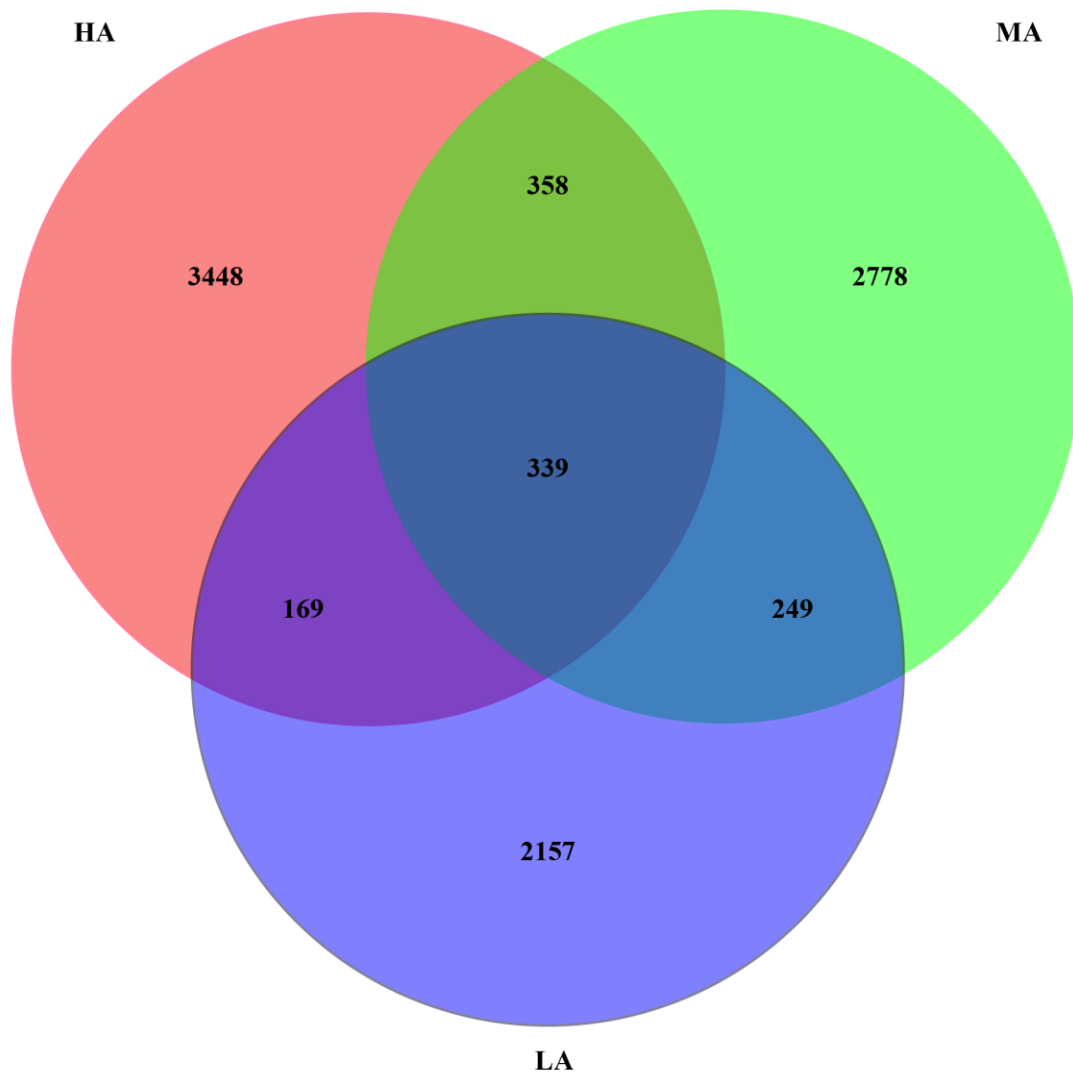

**Supplementary Fig. 1.** Venn diagram representing the common and unique OTUs found at each diet. HA, high alfalfa percentages group; MA, middle alfalfa percentages group; LA, low alfalfa percentages group.
